# Supplementary material for: Inadequacy of Body Weight-Based Recommendations for Individual Protein Intake—Lessons from Body Composition Analysis
Source: Nutrients. 2016 Dec 31;9(1):23. doi: 10.3390/nu9010023 (PMC5295067; doi:10.3390/nu9010023)
Supplement: Supplementary file 1 [file nutrients-09-00023-s001.pdf]

# Supplementary Materials: Inadequacy of Body Weight-Based Recommendations for Individual Protein Intake—Lessons from Body Composition Analysis

Corinna Geisler, Carla M. Prado and Manfred J. Müller

**Table S1.** Measured (by indirect calorimetry) and calculated (according to Harris and Benedict [1]) resting energy expenditure (REE) in kcal per day in healthy subjects ( $n = 574$ ) and cirrhotic patients ( $n = 403$ )<sup>1</sup>.

| REE (kcal/day) | Healthy Subjects |                | Cirrhotic Patients |                |
|----------------|------------------|----------------|--------------------|----------------|
|                | Measured         | Calculated     | Measured           | Calculated     |
| All            | 1671.9 ± 325.2 * | 2062.7 ± 471.7 | 1697.1 ± 206.4 *   | 1488.8 ± 244.2 |
| Females        | 1521.9 ± 261.2 * | 1965.9 ± 499.9 | 1560.4 ± 109.7 *   | 1311.9 ± 122.5 |
| Males          | 1864.2 ± 297.1 * | 2186.8 ± 400.9 | 1822.6 ± 194.5 *   | 1651.3 ± 213.4 |
| Non Sarcopenic | 1687.9 ± 332.4 * | 2065.6 ± 482.0 | 1754.9 ± 125.4 *   | 1530.9 ± 250.5 |
| Sarcopenic     | 1600.1 ± 281.4 * | 2049.8 ± 424.6 | 1557.4 ± 194.7 *   | 1387.2 ± 194.7 |

<sup>1</sup> Data are presented means ± SD; \* significant differences between measured and calculated resting energy expenditure (paired  $t$ -test):  $p < 0.05$ ; REE: resting energy expenditure.

## Reference

1. Harris, J.A.; Benedict, F.G. *A Biometric Study of Basal Metabolism in Man*; Carnegie Institution of Washington: Washington, DC, USA, 1919.
